# Supplementary material for: Cisplatin-induced increase in heregulin 1 and its attenuation by the monoclonal ErbB3 antibody seribantumab in bladder cancer
Source: Springer Nature journal article supplement (doi:10.1038/s41598-023-36774-1), 2023-06-14

# SUPPLEMENTARY TABLES

**Supplementary Table 1: Subject Characteristics**

|                        |             |
|------------------------|-------------|
| Age at Path Date       | (n=55)      |
| Mean (SD)              | 66.3 (11.7) |
| Median (Range)         | 68 (36--85) |
| Gender                 |             |
| F                      | 10 (18.2%)  |
| M                      | 45 (81.8%)  |
| Race                   |             |
| African American       | 1 (1.8%)    |
| Asian                  | 1 (1.8%)    |
| Caucasian              | 34 (61.8%)  |
| Other                  | 3 (5.5%)    |
| Not Listed             | 16 (29.1%)  |
| Ethnicity              |             |
| Hispanic or Latino     | 4 (7.55%)   |
| Not Hispanic or Latino | 34 (54.55%) |
| Other                  | 8 (15.09%)  |
| Not Listed             | 7 (13.21%)  |
| NEC                    |             |
| Chemotherapy           | 14 (25.5%)  |
| No Chemo reported      | 41 (74.5%)  |
| Deceased               |             |
| Not Deceased           | 39 (70.9%)  |
| Subject Deceased       | 16 (29.1%)  |

**Supplementary Table 2: Antibodies used in this study**

| Antigen               | Source                    | Catalog No | Dilution        | Application |
|-----------------------|---------------------------|------------|-----------------|-------------|
| Actin                 | Santa Cruz Biotechnology  | sc-1616    | <b>“1:1000”</b> | WB          |
| AKT                   | Santa Cruz Biotechnology  | #4685      | <b>“1:1000”</b> | WB          |
| phospho-AKT(S473)     | Cell Signaling Technology | #9271      | <b>“1:500”</b>  | WB          |
| phospho-AKT(S473)     | Cell Signaling Technology | #3787      | <b>“1:50”</b>   | IHC         |
| Cleaved Caspase- 3    | Cell Signaling Technology | #9661      | <b>“1:1000”</b> | WB          |
| Cleaved- PARP (D214)  | Cell Signaling Technology | #9546      | <b>“1:1000”</b> | WB          |
| EGFR                  | Cell Signaling Technology | #2232      | <b>“1:500”</b>  | WB          |
| EGFR                  | Invitrogen                | #280005    | <b>“1:40”</b>   | IHC         |
| phospho-EGFR (Y1045)  | Cell Signaling Technology | #2237      | <b>“1:50”</b>   | IHC         |
| phospho-EGFR (Y1068)  | Cell Signaling Technology | #2234      | <b>“1:500”</b>  | WB          |
| phospho-EGFR (Y1068)  | Cell Signaling Technology | #3777      | <b>“1:500”</b>  | WB          |
| phospho-EGFR (Y845)   | Cell Signaling Technology | #2231      | <b>“1:50”</b>   | IHC         |
| ErbB2/HER2            | Santa Cruz Biotechnology  | sc-284     | <b>“1:500”</b>  | WB          |
| ErbB2/HER2            | DAKO                      | #A0485     | <b>“1:200”</b>  | IHC         |
| phospho-ErbB2 (Y1248) | Millipore                 | #06-229    | <b>“1:100”</b>  | IHC         |
| phospho-ErbB2 (Y877)  | Cell Signaling Technology | #2241      | <b>“1:250”</b>  | WB          |
| phospho-ErbB2(Y1248)  | Cell Signaling Technology | #2247      | <b>“1:250”</b>  | WB          |
| ErbB3                 | Cell Signaling Technology | #12708     | <b>“1:500”</b>  | WB          |
| ErbB3                 | Santa Cruz Biotechnology  | sc-285     | <b>“1:500”</b>  | WB          |
| ErbB3                 | Cell Signaling Technology | #12708     | <b>“1:250”</b>  | IHC         |
| phospho-ErbB3 (Y1289) | Cell Signaling Technology | #4791      | <b>“1:500”</b>  | WB          |
| phospho-ErbB3 (Y1289) | Cell Signaling Technology | #4791      | <b>“1:100”</b>  | IHC         |

|                               |                              |           |                 |     |
|-------------------------------|------------------------------|-----------|-----------------|-----|
| phospho-ErbB3<br>(Y1328)      | Cell Signaling<br>Technology | #8017     | <b>“1:250”</b>  | IHC |
| ErbB4                         | Santa Cruz<br>Biotechnology  | sc-283    | <b>“1:500”</b>  | WB  |
| ERK                           | Santa Cruz<br>Biotechnology  | sc-93     | <b>“1:1000”</b> | WB  |
| phospho-ERK1/2<br>(T202/Y204) | Cell Signaling<br>Technology | #9107     | <b>“1:500”</b>  | WB  |
| phospho-ERK1/2<br>(T202/Y204) | Cell Signaling<br>Technology | #9101     | <b>“1:50”</b>   | IHC |
| GAPDH                         | Millipore                    | MAB374    | <b>“1:1000”</b> | WB  |
| NRG1/HRG1                     | ThermoFisher                 | MA5-12896 | <b>“1:100”</b>  | IHC |
| PARP                          | Cell Signaling<br>Technology | #9532     | <b>“1:1000”</b> | WB  |
| α-tubulin                     | Cell Signaling<br>Technology | #2125     | <b>“1:1000”</b> | WB  |

**Supplementary Table 3: Characteristics of cell lines used in this study**

| <b>Cell line</b> | <b>Patient Gender</b> | <b>Patient Age</b> | <b>Disease</b>                            |
|------------------|-----------------------|--------------------|-------------------------------------------|
| T24              | Female, Caucasian     | 82 years           | Transitional Cell Carcinoma, infiltrating |
| RT4              | Male, Caucasian       | 63 years           | Transitional cell Papilloma, superficial  |
| J-82             | Male, Caucasian       | 58 years           | Transitional Cell Carcinoma, infiltrating |
| TCCSUP           | Female                | 67 years           | Transitional Cell Carcinoma - grade IV    |

# SUPPLEMENTARY FIGURES AND LEGENDS

**Supplementary Figure 1. (A) Expression of EGFR family of RTKs and their ligands in various PDX tumors.** We previously reported the expression of these genes (Pan CX, et al. PLoS One. 2015 Aug 13;10(8):e0134346). **(B) BL0269 tumors collected after 3- and 17-days following cisplatin treatment showed little alteration in HER2 or ErbB3 expression.** Mice bearing BL0269 tumors were treated with vehicle or cisplatin and sacrificed after 3 or 17 days. Tumors were extracted, formalin fixed, and paraffin embedded. Then the FFPE samples sectioned and stained for HER2 and ErbB3 as indicated (bar: 50  $\mu$ m).

**A**

| Gene_id | BL0269   | BL0293   | BL0382   | BL0429   | BL0440   | BL0479   | BL0515   |               |
|---------|----------|----------|----------|----------|----------|----------|----------|---------------|
| EGFR    | 21.0464  | 18.1222  | 774.834  | 13.4476  | 10.6429  | 58.0531  | 5.29813  |               |
| ERBB2   | 51.2582  | 19.2033  | 59.1518  | 134.383  | 158.051  | 42.2478  | 2.72069  |               |
| ERBB3   | 46.4868  | 0.439931 | 55.5352  | 98.1242  | 46.0066  | 16.3607  | 5.14123  |               |
| ERBB4   | 0.016168 | 0.00443  | 0.077381 | 0.202483 | 0.076507 | 0.012297 | 0        |               |
| EGF     | 0.019461 | 0.004914 | 2.79154  | 0.113574 | 0.005308 | 0.087321 | 0.006496 | EGFR ligands  |
| TGFA    | 8.46481  | 0.772886 | 9.36473  | 22.4229  | 26.4098  | 13.1027  | 4.29631  |               |
| HBEGF   | 8.81754  | 38.1933  | 3.07479  | 9.55732  | 6.64756  | 23.7702  | 10.701   |               |
| BTC     | 3.66545  | 1.09723  | 5.61878  | 6.82015  | 2.73333  | 1.55123  | 0.150942 |               |
| EREG    | 0.936432 | 9.26914  | 5.81843  | 6.61556  | 10.5626  | 8.00116  | 2.20566  |               |
| AREG    | 1.38585  | 9.11948  | 4.45696  | 2.38864  | 9.79421  | 23.0393  | 7.93021  |               |
| NRG1    | 4.65335  | 0.046631 | 0.046317 | 0.196113 | 0.343242 | 26.1146  | 3.95403  |               |
| NRG2    | 0.017822 | 4.40665  | 0.017461 | 0.139362 | 0.055458 | 0.053952 | 1.50369  | ErbB3 ligands |
| NRG3    | 0        | 0        | 0        | 0.462223 | 0        | 0        | 0        | ErbB4 ligands |
| NRG4    | 1.80216  | 1.01439  | 5.42594  | 3.02877  | 0.690328 | 0.375798 | 0.876469 |               |

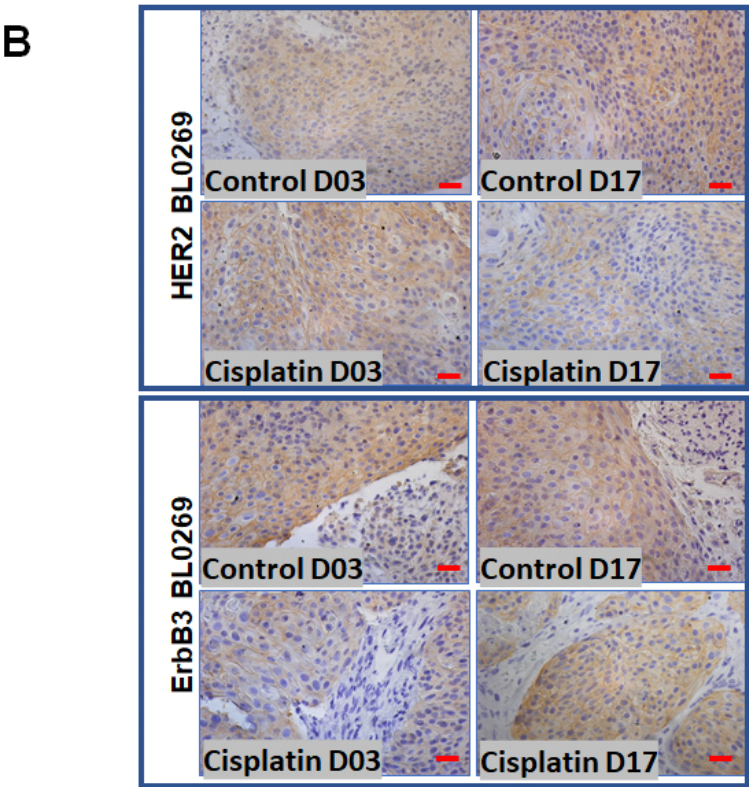

**Supplementary Figure 2. BL0269 tumors collected after 3- and 17-days following cisplatin treatment showed little alteration in EGFR phosphorylation.**

Mice bearing BL0269 tumors were treated with vehicle or cisplatin and sacrificed after 3 or 17 days. Tumors were extracted, formalin fixed, and paraffin embedded. Then the FFPE samples sectioned and stained for various phospho-proteins as indicated (bar: 50  $\mu$ m).

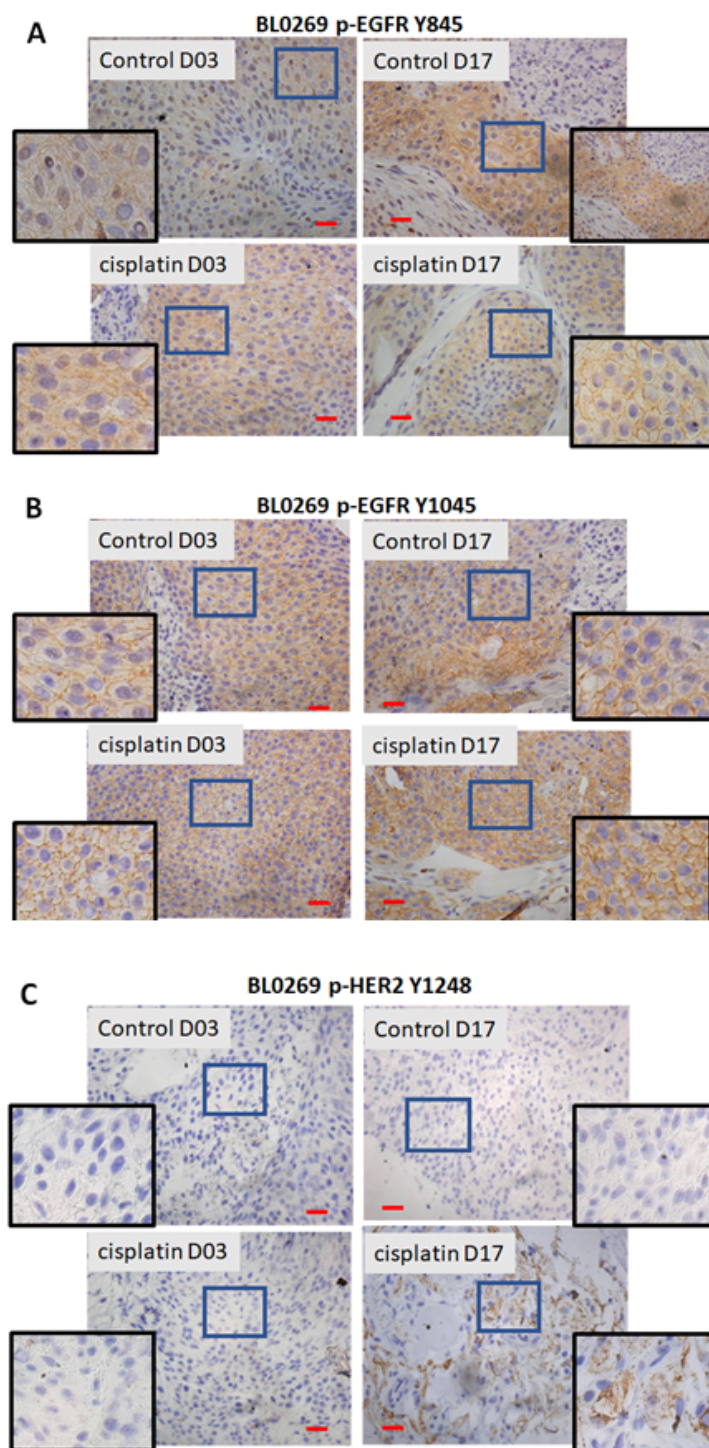

**Supplementary Figure 3: Effects of cisplatin treatment of cisplatin on bladder cancer cell lines.**

**A).** T24, RT4, TCCSUP and J82 cells were treated with platinum binding buffer (3 mM NaCl and 1 mM sodium phosphate) (CBB) or 200 nM cisplatin in CBB for 72 hours. Immunoblots were subjected to anti-phospho-ErbB3 (Y1289) antibody or total ErbB3. Note that ErbB3 levels were much higher in RT4 cells compared to the rest, and therefore, we are showing here both an exposure that shows the expression of ErbB3 in T24 and J82 cells (TCCSUP did not appear to express detectable levels of ErbB3) and another exposure that showed the relative levels of ErbB3 in RT4 cells. **B).** Correlation of ERK phosphorylation with patient death, which was determined at the time of analysis. ERK phosphorylation was scored separately in the nucleus and the cytoplasm. Patient death correlated with nuclear ERK phosphorylation but not phosphorylation of cytoplasmic ERK1/2, indicating that it is the genomic effects of ERK phosphorylation that regulate patient survival.

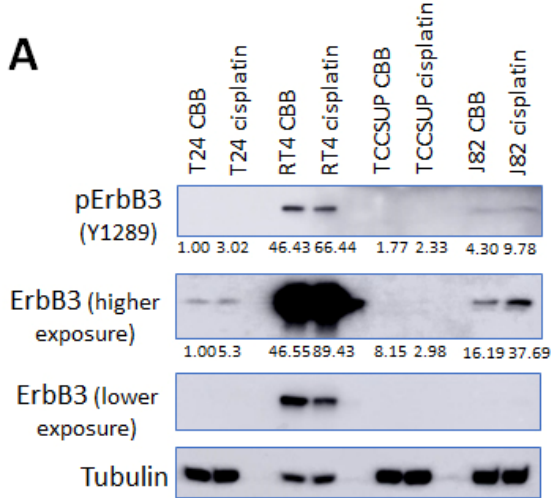

**B** Marker Expression by Death

|                | Not Deceased | Subject Deceased |
|----------------|--------------|------------------|
| PERK.N         |              |                  |
| N              | 39           | 16               |
| Median (Range) | 0 (0--1)     | 0.5 (0--1)       |
| PERK.C         |              |                  |
| N              | 39           | 16               |
| Median (Range) | 0.5 (0--1.5) | 0.5 (0--1.2)     |



**Supplementary Figure 4. Increased expression of HRG1 in cisplatin resistant T24 and RT4 cells compared to cisplatin sensitive J82 and TCCSUP.**

- (A)** The four cell lines were pelleted and the cell pellets formalin fixed and paraffin embedded. The FFPE cell pellets were then sectioned and stained for HRG1. Results indicate that T24 and RT4 cells express higher HRG1 (brown staining, see inset) compared to J82 and TCCSUP (bar: 50  $\mu$ M).
- (B)** Extrinsic HRG1 localizes to the cell membrane. Cells were cultured in medium containing charcoal stripped serum to remove all steroids and growth factors including HRG1. Then the cells were treated for 72 hours with 200 nM cisplatin, which increased intrinsic HRG1 (localized to the cytosol). However, at the end of that period, 50 ng/ml extrinsic HRG1 was added to the medium for 15 minutes, then the cells were washed and fixed. Fixed cells were stained for HRG1. The extrinsic HRG1 localized to the cell membrane (bar: 15  $\mu$ M).

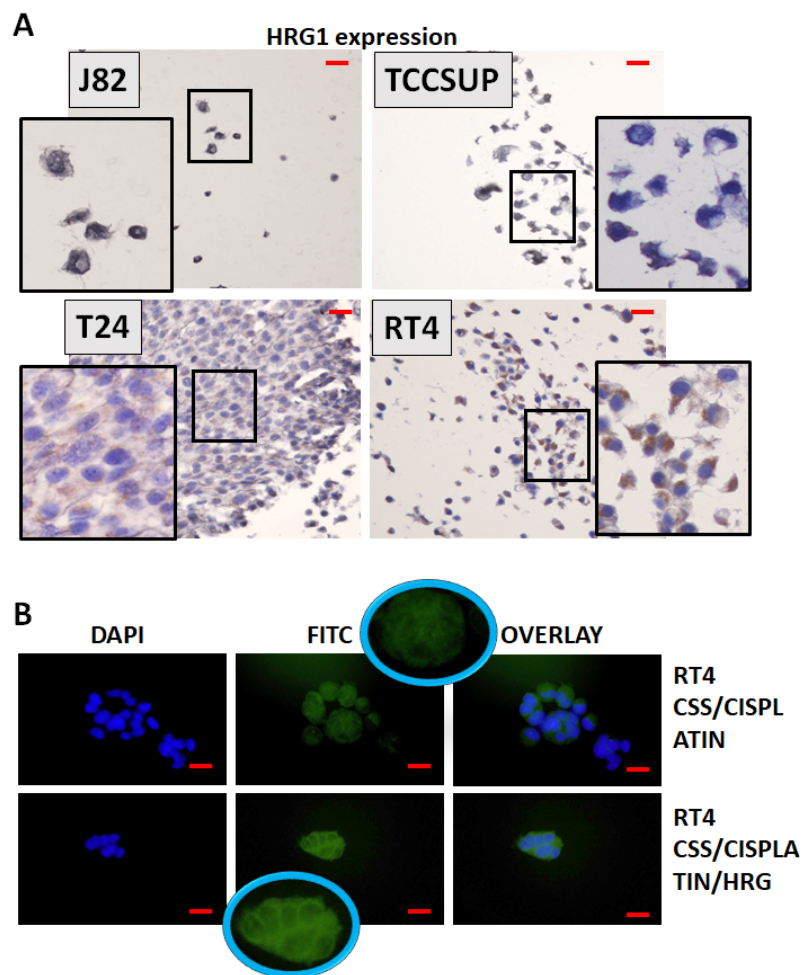



**Supplementary Figure 5. Effect of the combination of cisplatin and seribantumab/MM-121 on ErbB3 protein levels in BL0269 tumors.**

**A)** Log-rank (Mantel Cox) test for the comparison of survival groups. **B)** Immunocompromised mice bearing BL0269 tumors treated with vehicle (control), 2 mg/Kg cisplatin, 10 mg/Kg seribantumab (MM-121) and the combination of the two were formalin fixed and paraffin embedded. Sections were stained for ErbB3 levels by immunohistochemistry- (bar: 25  $\mu$ m). **C).** Representative tumors from the four groups that were obtained following euthanasia of the mice at the end of the experiment. The tumors were formalin fixed and paraffin embedded, after which the blocks were sectioned and stained for ErbB3 phosphorylation (Y1289) (bar: 50  $\mu$ m). Inset: Enlarged figures showing ErbB3 phosphorylation in the four groups.

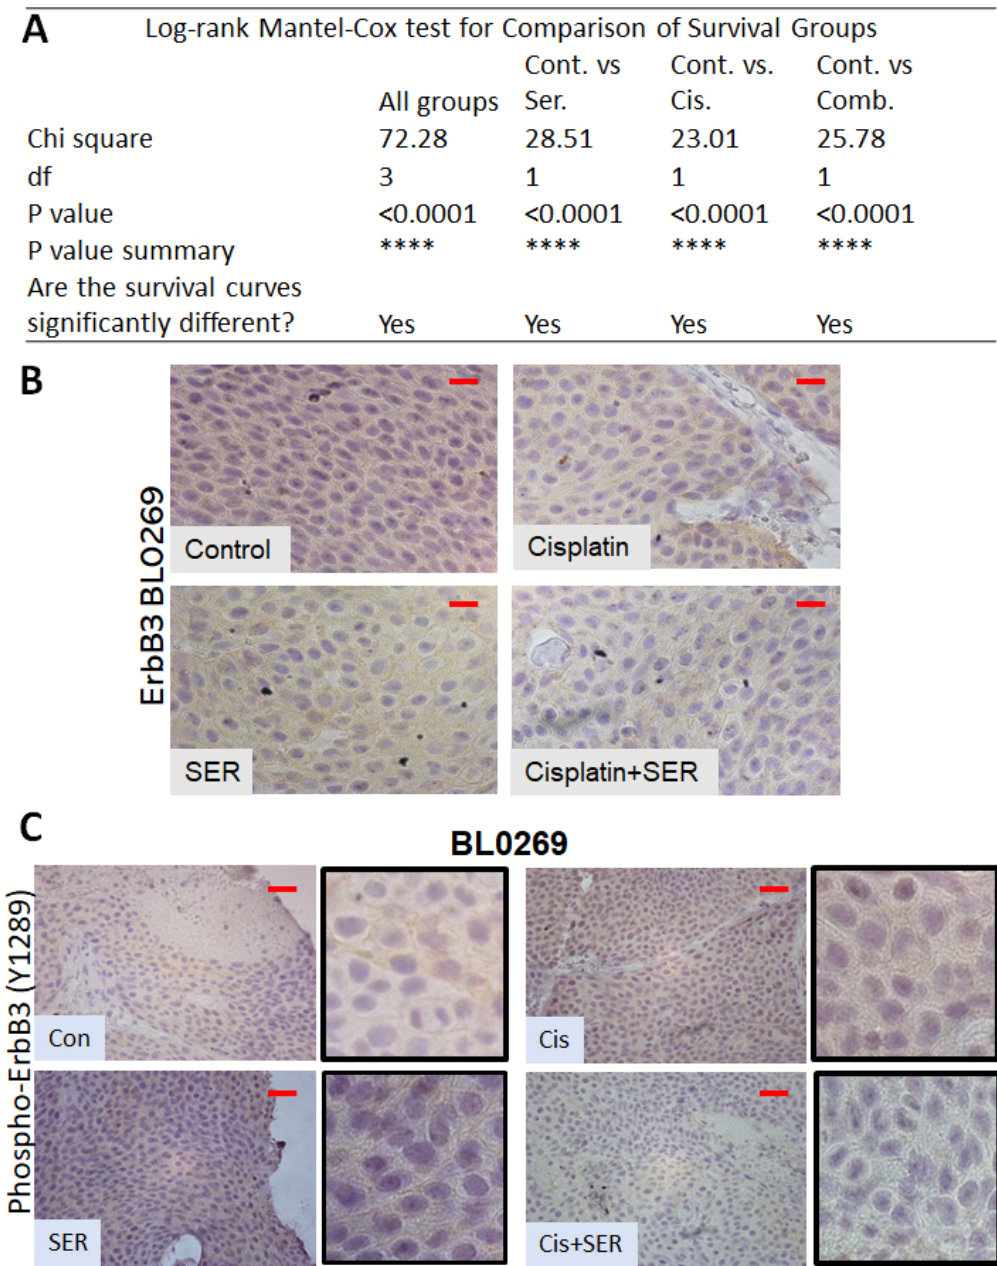

**Supplementary Figure 6. Seribantumab, but not trastuzumab, reduces tumor growth in the cisplatin sensitive BL0440 PDX model and in cisplatin resistant T24 cells.**

**A).** J82 cells were treated with vehicle, 200 nM cisplatin, 2  $\mu$ M seribantumab or the combination for 72 hours, after which cells were trypsinized, and unfixed cells were stained with propidium iodide (PI) and Annexin V (AV). Stained cells were then assayed by flow cytometry. Data obtained was analyzed to obtain fractions that represent live cells (unstained), early apoptosis (Annexin V stained), late apoptosis (both AV and PI treated) and in necrosis (PI only). **B, C)** Mice dually implanted with BL0440 PDX tumors were treated with 10 mg/kg seribantumab, 10 mg/kg Herceptin (trastuzumab), or placebo twice weekly for three weeks and then monitored for up to 10 days. **B).** Corresponding box and whisker plots of tumor size. **C).** Immunohistochemical staining of ErbB3 of BL0440 PDX tumors treated with vehicle or trastuzumab. Bar: 50  $\mu$ m.

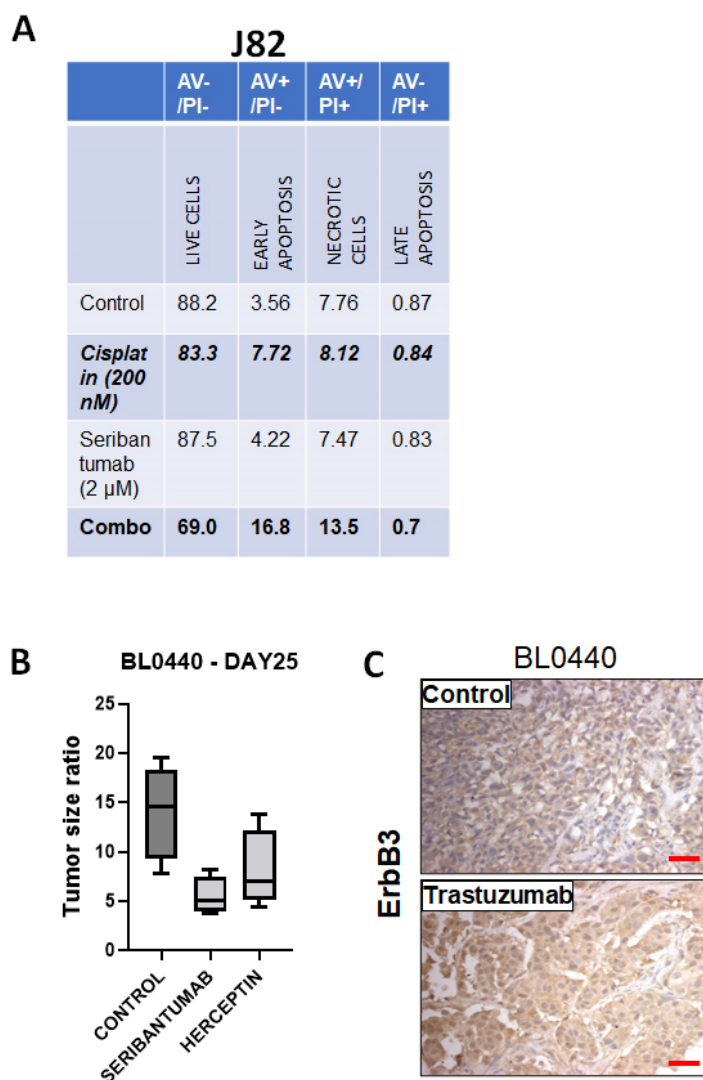

Supplement: MOESM1 [file 41598_2023_36774_MOESM1_ESM.pdf]
